# Supplementary material for: Unraveling the Genetic Diversity and Population Structure of Bangladeshi Indigenous Cattle Populations Using 50K SNP Markers
Source: MDPI journal article supplement (doi:10.3390/ani11082381), 2021-08-12
Supplement: s1 [file s1]

*Supplementary Materials*

# Unraveling the Genetic Diversity and Population Structure of Bangladeshi Indigenous Cattle Populations Using 50K SNP Markers

Mohammad Shamsul Alam Bhuiyan <sup>1</sup>, Soo-Hyun Lee <sup>2</sup>, Sheikh Mohammad Jahangir Hossain <sup>3</sup>, Gautam Kumar Deb <sup>3</sup>, Most Farhana Afroz <sup>3</sup>, Seung-Hwan Lee <sup>4,\*</sup> and Abul Kashem Fazlul Haque Bhuiyan <sup>1,\*</sup>

<sup>1</sup> Department of Animal Breeding and Genetics, Bangladesh Agricultural University, Mymensingh 2202, Bangladesh; msabhuiyan.abg@bau.edu.bd

<sup>2</sup> Division of Animal Breeding and Genetics, National Institute of Animal Science, Cheonan 31000, Korea; lhyungm@korea.kr

<sup>3</sup> Animal Biotechnology Division, Bangladesh Livestock Research Institute, Savar 1341, Bangladesh; smjhossainblri@yahoo.com (S.M.J.H.); debgk2003@yahoo.com (G.K.D.); famukta@yahoo.com (M.F.A.)

<sup>4</sup> Division of Animal and Dairy Science, Chungnam National University, Daejeon 34134, Korea

\* Correspondence: slee46@cnu.ac.kr (S.H.L.); bhuiyanbau@gmail.com (A.K.F.H.B.); Tel.: +82-042-821-5878 (S.H.L.); +88-091-67401-6 (ext. 2614) (A.K.F.H.B.)

**Citation:** Bhuiyan, M.S.A.; Lee, S.-H.; Hossain, S.M.J.; Deb, G.K.; Afroz, M.F.; Lee, S.-H.; Bhuiyan, A.K.F.H. Unraveling the Genetic Diversity and Population Structure of Bangladeshi Indigenous Cattle Populations Using 50K SNP Markers. *Animals* **2021**, *11*, 2381. <https://doi.org/10.3390/ani11082381>

Academic Editor: Kor Oldenbroek

Received: 13 July 2021

Accepted: 09 August 2021

Published: 12 August 2021

**Publisher's Note:** MDPI stays neutral with regard to jurisdictional claims in published maps and institutional affiliations.

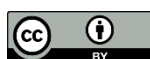

**Copyright:** © 2021 by the authors. Licensee MDPI, Basel, Switzerland. This article is an open access article distributed under the terms and conditions of the Creative Commons Attribution (CC BY) license (<http://creativecommons.org/licenses/by/4.0/>).

**Table S1.** Cattle breeds or populations and number of samples used in this study.

| Sl. No.                 | Breed/Population   | Breed Code | Geographic Location | Sample Size | Type     |
|-------------------------|--------------------|------------|---------------------|-------------|----------|
| 1.                      | Sahiwal            | SL         | Bangladesh          | 15          | Indicine |
| 2.                      | Munshigani         | MC         | Bangladesh          | 26          | Indicine |
| 3.                      | Non-descript Deshi | DES        | Bangladesh          | 22          | Indicine |
| 4.                      | North Bengal Grey  | NBG        | Bangladesh          | 21          | Indicine |
| 5.                      | Pabna              | PC         | Bangladesh          | 45          | Indicine |
| 6.                      | Red Chittagong     | RCC        | Bangladesh          | 89          | Indicine |
| 7.                      | Brahman            | BRM        | South Asia          | 25          | Indicine |
| 8.                      | Nellore            | NEL        | South Asia          | 21          | Indicine |
| 9.                      | Korean Hanwoo      | KPN        | East Asia           | 20          | Taurine  |
| 10.                     | Korean Chikso      | CHK        | East Asia           | 20          | Taurine  |
| 11.                     | Korean Jeju Black  | JB         | East Asia           | 60          | Taurine  |
| 12.                     | Yianbian           | YBH        | Central Asia        | 39          | Taurine  |
| 13.                     | Mongol             | MG         | Central Asia        | 28          | Taurine  |
| 14.                     | Angus              | ANG        | Europe              | 24          | Taurine  |
| 15.                     | Brown Swiss        | BSW        | Europe              | 22          | Taurine  |
| 16.                     | Hereford           | HFD        | Europe              | 21          | Taurine  |
| 17.                     | Holstein           | HOL        | Europe              | 30          | Taurine  |
| 18.                     | Limousin           | LMS        | Europe              | 25          | Taurine  |
| 19.                     | Guernsey           | GNS        | Europe              | 21          | Taurine  |
| 20.                     | Santa geltrudis    | SGT        | Europe              | 24          | Taurine  |
| 21.                     | Beefmaster         | BMA        | Europe              | 24          | Taurine  |
| 22.                     | N'Dama             | ND         | Africa              | 25          | Taurine  |
| 23.                     | Oulmes Zaer        | OUL        | Africa              | 26          | Taurine  |
| 24.                     | Zebu Madagascar    | ZMA        | Africa              | 30          | Indicine |
| 25.                     | Sheko              | SHK        | Africa              | 20          | Indicine |
| <b>Breed/Population</b> |                    |            | <b>Total sample</b> | <b>723</b>  |          |

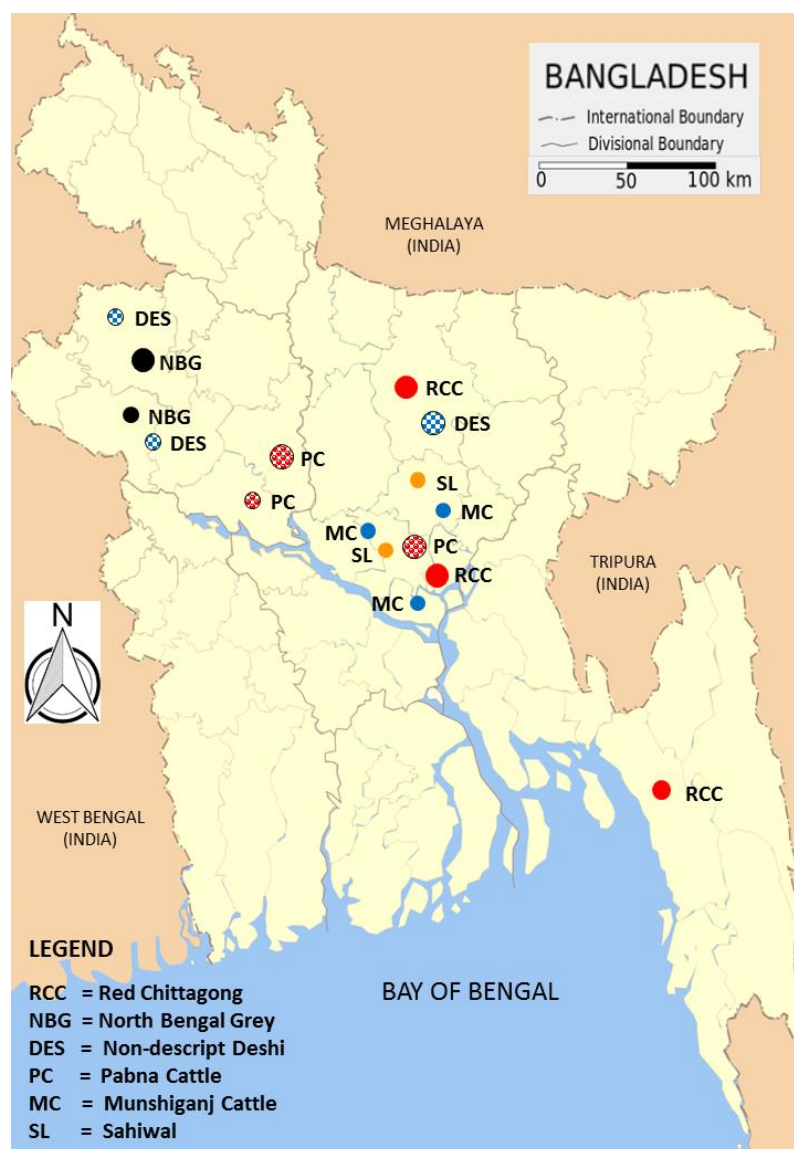

**Figure S1.** Map of Bangladesh indicating the approximate geographic origin of the cattle samples analysed. Samples of each population were collected from both in-situ and ex-situ conditions. Circle sizes are proportionate with the collected samples.

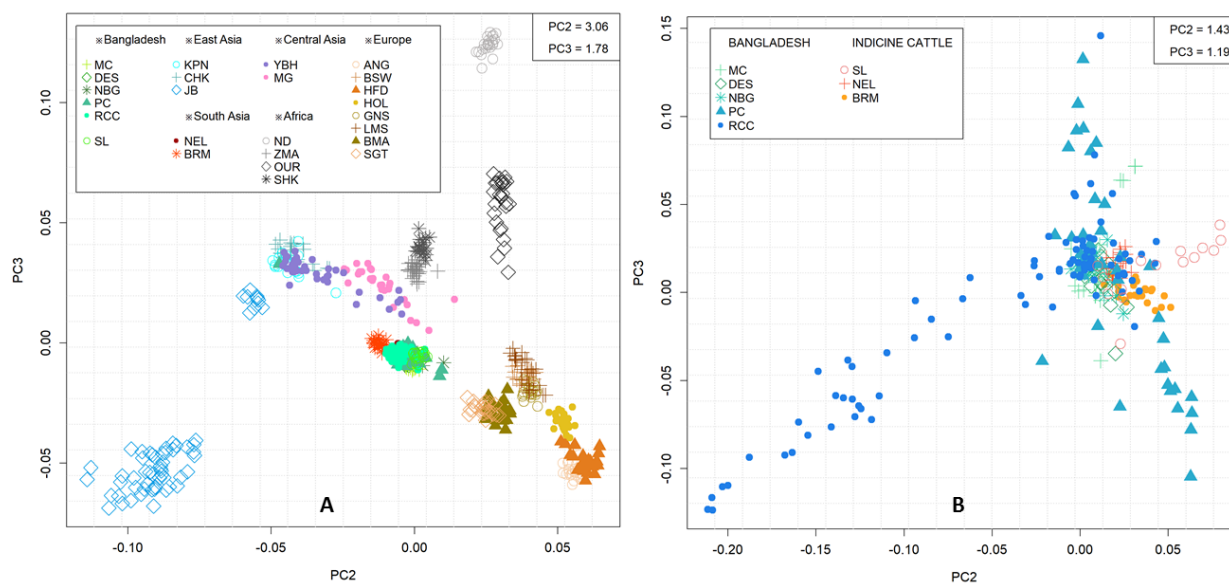

**Figure S2.** Principal component analysis between PC1 and PC3 in worldwide cattle populations (A) and eight indicine cattle breeds/populations only (B). Cattle populations are labelled as Sahiwal (SL), Munshiganj (MC), Non-descript Deshi (DES), North Bengal Grey (NBG), Pabna (PC), Red Chittagong (RCC), Brahman (BRM), Nellore (NEL), Korean Hanwoo (KPN), Korean Chikso (CHK), Korean Jeju Black (JB), Yianbian (YBH), Mongolian (MG), Angus (ANG), Brown Swiss (BSW), Hereford (HFD), Holstein (HOL), Guernsey (GNS), Limousine (LMS), Santa Gertrudis (SGT), Beefmaster (BMA), N'Dama (ND), Oulmes Zaer (OUR), Zebu Madagascar (ZMA) and Sheko (SHK).

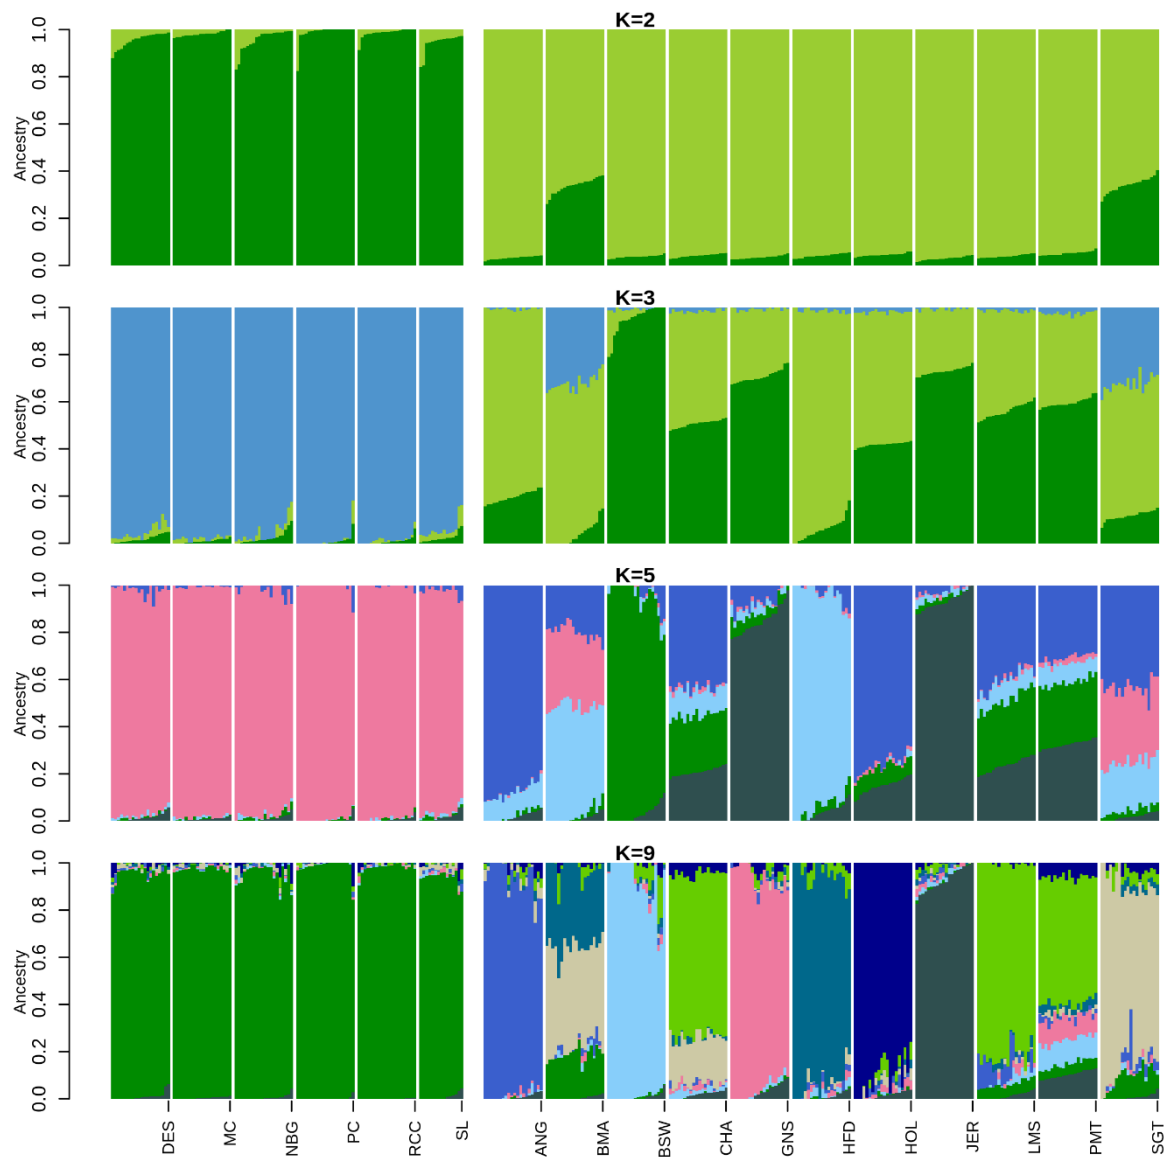

**Figure S3.** Structure plots showing proportions at assumed ancestries for  $K = 2$  to 9 including 17 breeds/populations from Bangladesh and European taurine breeds. Reference breeds labelled are shown in Figure 2.

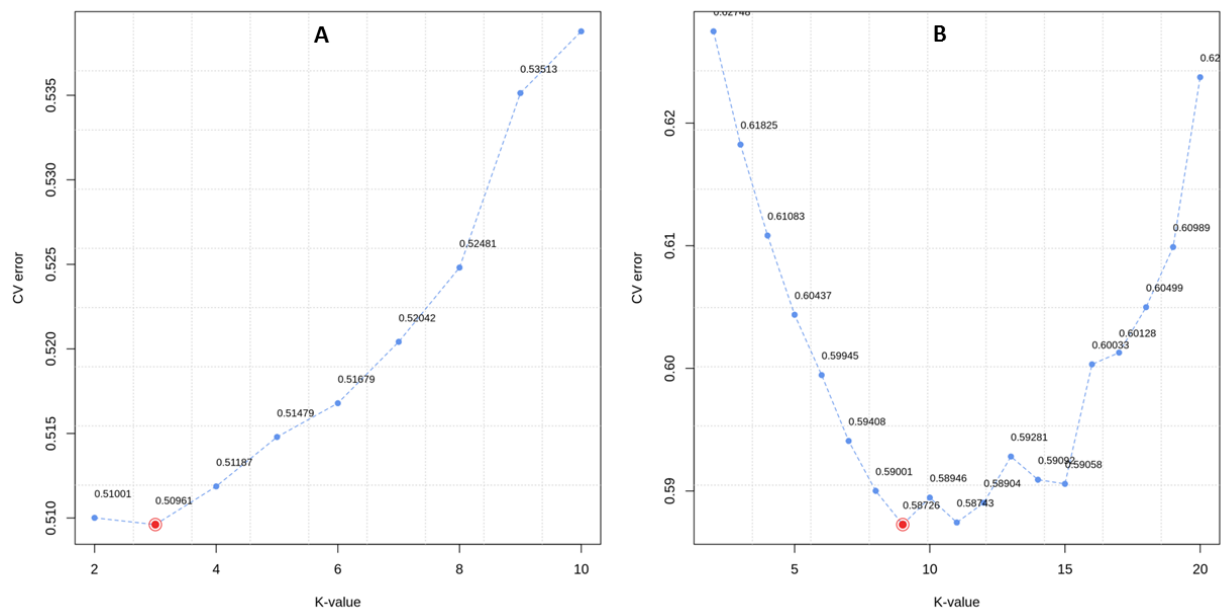

**Figure S4.** The cross-validation error to determine optimized K value; considering only Indigenous cattle population of Bangladesh (A) and based on 25 cattle populations distributed worldwide (B).
